# Supplementary material
Source: PubMed Central journal article supplement (PMC7269493)
Supplement: AAC.02311-19-s0001.pdf [file AAC.02311-19-s0001.pdf]

## **SUPPLEMENTARY MATERIAL**

### **Ceftazidime-avibactam resistance mediated by the N<sup>346</sup>Y substitution in various AmpC $\beta$ -lactamases**

Fabrice Compain<sup>1,2</sup>, Agathe Debray<sup>1</sup>, Pauline Adjadj<sup>1</sup>, Delphine Dorchêne<sup>1</sup>, Michel Arthur<sup>1\*</sup>

<sup>1</sup> INSERM, Sorbonne Université, Université de Paris, Centre de Recherche des Cordeliers, 75006 Paris, France. <sup>2</sup>Assistance Publique-Hôpitaux de Paris, Centre Université de Paris, Service de microbiologie, Hôpital Européen Georges Pompidou, 75015 Paris, France

**Supplementary Table S1. Primers used in this study**

| <b>Primers</b>                                                             | <b>Nucleotide sequence (5' – 3')<sup>a</sup></b>                                                               |
|----------------------------------------------------------------------------|----------------------------------------------------------------------------------------------------------------|
| <b>Cloning in pTRC99k (phenotypic analysis in <i>E. coli</i> Top10)</b>    |                                                                                                                |
| PDC-5_EcoRI_F                                                              | AAAGAATTCATGCGCGATACCAGATTCC                                                                                   |
| PDC-5_XbaI_R                                                               | AAATCTAGATCAGCGCTTCAGCGGCACC                                                                                   |
| DHA-1_EcoRI_F                                                              | AAAGAATTCATGAAAAAATCGTTATCTG                                                                                   |
| DHA-1_SalI_R                                                               | AAAGTCGACTTATTCCAGTGC ACTCAA                                                                                   |
| FOX-3_EcoRI_F                                                              | AAAGAATTCATGCAACAACGACGTGCGT                                                                                   |
| FOX-3_SalI_R                                                               | AAAGTCGACTCACTCGGCCAACTGACTC                                                                                   |
| AmpC <sub>cloacae</sub> _EcoRI_F                                           | AAAGAATTCATGATGAGAAAATCCCTTT                                                                                   |
| AmpC <sub>cloacae</sub> _SalI_R                                            | AAAGTCGACTTACTGTAGCGCCTCGAGG                                                                                   |
| <b>Cloning in pET-TEV (protein production in <i>E. coli</i> BL21(DE3))</b> |                                                                                                                |
| PDC-5_NdeI_F                                                               | AAACATATGGGCGAGGCCCGGCGGATC                                                                                    |
| PDC-5_XhoI_R                                                               | AAAACCTCGAGTCAGCGCTTCAGCGGCACC                                                                                 |
| DHA-1_NdeI_F                                                               | AACATATGGATAATGTTCGCGGCGGTG                                                                                    |
| DHA-1_XhoI_R                                                               | AACTCGAGTTATTCCAGTGC ACTCAA                                                                                    |
| FOX-3_NdeI_F                                                               | AACATATGCGCGGGGAGGCTCCGCTGAC                                                                                   |
| FOX-3_XhoI_R                                                               | AACTCGAGTCACTCGGCCAACTGACTCA                                                                                   |
| AmpC <sub>cloacae</sub> _NdeI_F                                            | AAACATATGACGCCAGTGT CAGAAAAC                                                                                   |
| AmpC <sub>cloacae</sub> _NotI_R                                            | AAGCGGCCGCTTACTGTAGCGCCTCGAGG                                                                                  |
| <b>Site-directed mutagenesis</b>                                           |                                                                                                                |
| PDC-5_N346Y_R                                                              | AAAGTCGACTCAGCGCTTCAGCGGCACCTTGCCCTGCT<br>GCTCCAGGCCGCTGAGGATGGCGTAGGCGATCTTCACC<br>CGCTCGGCGTAGGGATAGTTGCGGTT |
| DHA-1_N346Y_R                                                              | AAAGTCGACTTATTCCAGTGC ACTCAAATAGCCTGTG<br>CAGCTTTGACTCTTTCGGTGTACGGGTAGTTTTTATTC                               |
| FOX-3_N346Y_R                                                              | AAAGTCGACTCACTCGGCCAACTGACTCAGGATGGCGT<br>GAGCCGCCTTCACCCTGGCCTCGTAGGGATAGTTGC                                 |

The restriction sites used for cloning are underlined; F, forward; R, reverse. For mutagenesis, bases introduced into the nucleotide sequence to generate the N<sup>346</sup>Y and I<sup>346</sup>Y substitutions are indicated in bold. Primers used for production of AmpC variants were identical to those used for production of native AmpC cephalosporinases.

**Supplementary Table S2. Wavelength ( $\lambda$ ) and variation in the molecular extinction coefficient ( $\Delta\epsilon$ ) used for kinetic analyses of  $\beta$ -lactam hydrolysis based on spectrophotometry**

| $\beta$ -lactam | $\lambda$ (nm) | $\Delta\epsilon$ ( $M^{-1} cm^{-1}$ ) |
|-----------------|----------------|---------------------------------------|
| Amoxicillin     | 244            | -1,200                                |
| Cephalothin     | 265            | -8,100                                |
| Cefamandole     | 268            | -6,000                                |
| Cefoxitin       | 265            | -7,400                                |
| Cefotaxime      | 255            | -8,400                                |
| Ceftazidime     | 256            | -9,800                                |
| Aztreonam       | 318            | -400                                  |
| Cefepime        | 257            | -8,100                                |
| Nitrocefin      | 486            | 14,600                                |

|                           | 1          | 10         | 20         | 30         | 40         | 50         | 60          | 70         | 80          | 90        | 100       |     |
|---------------------------|------------|------------|------------|------------|------------|------------|-------------|------------|-------------|-----------|-----------|-----|
|                           | .... ....  | .... ....  | .... ....  | .... ....  | .... ....  | .... ....  | .... ....   | .... ....  | .... ....   | .... .... | .... .... |     |
| <i>E. cloacae</i> AmpC    | ---MMRKS-- | ----LCCAL  | LLGISCSALA | TPVSEKQLAE | VVANTITPLM | KAQSVPGMAV | AVIYQGKPHY  | YTFGKADIAA | NKPVTPQTLF  | EL        | SISK      | TFT |
| <i>P. aeruginosa</i> AmpC | ----MRDTRF | PCLCGIAAST | LLFATTPAIA | GEAPADRLKA | LVDAAVQPVM | KANDIPGLAV | AISLKGEPHY  | FSYGLASKED | GRQVTPETLF  | EI        | SVSK      | TFT |
| <i>E. coli</i> AmpC       | ----MFKT-- | ----TLCTL  | LITASCSTFA | AP---QQIND | IVHRTITPLI | EQQKIPGMAV | AVIYQGKPHY  | FTWGYADIAK | KQPVTQOTLF  | EL        | SVSK      | TFT |
| <i>C. freundii</i> AmpC   | ---MMKKS-- | ----ICCAL  | LLTASFSTFA | AAKTEQQIAD | IVNRTITPLM | QEQAIPGMAV | AIYEGKPHY   | FTWGKADIAN | NHPVTQOTLF  | EL        | SVSK      | TFN |
| <i>H. alvei</i> AmpC      | MRKKMQNT-- | -LKLLSVITC | LAATAQGALA | ANIDESKIKD | TVDDLIQPLM | QKNNIPGMSV | AVTVNGKNIY  | YNYGLAAKQP | QQPVTEENTLF | EV        | SLSK      | TFA |
| <i>M. organii</i> AmpC    | ---MKKS--  | ----LSATL  | ISALLAFSAP | GFSAADNVAA | VVDSTIKPLM | AQQDIPGMAV | AVSVKGPYY   | FNYGFADVQA | KQPVTENTLF  | EL        | SVSK      | TFT |
| <i>P. stuartii</i> AmpC   | ----MDNS-- | -MKNIFRQGR | LFIALSLAMT | SISAFALTQQ | EVDDIHKPLM | KQEQIPGMSV | AISVNGKQAI  | YHYGVQSKQT | QIPVSDRTLY  | EI        | SLSK      | TFT |
| <i>S. marcescens</i> AmpC | -----      | ----MTKMNR | LAAALIAALI | LPTAHAAQQQ | DIDAVIQPLM | KKYGVPGMAI | AVSVDGKQI   | YPYGVASKQT | GKPIEQTLF   | EV        | SLSK      | TFT |
| CMY-1                     | ----MQQRQS | ILWG--AVAT | LMWAGLAHAG | EASPVDPRLP | VVDASIQPLL | KEHRIPGMAV | AVLKDGHKAHY | FNYGVANRES | GAGVSEQTLF  | EI        | SVSK      | TLT |
| DHA-1                     | ---MKKS--  | ----LSATL  | ISALLAFSAP | GFSAADNVAA | VVDSTIKPLM | AQQDIPGMAV | AVSVKGPYY   | FNYGFADIQA | KQPVTENTLF  | EL        | SVSK      | TFT |
| ACC-1                     | ----MQNT-- | -LKLLSVITC | LAATAQGALA | ANIDESKIKD | TVDDLIQPLM | QKNNIPGMSV | AVTVNGKNIY  | YNYGLAAKQP | QQPVTEENTLF | EV        | SLSK      | TFA |
| ACT-1                     | --MMTKS--  | ----LCCAL  | LLSTSCSVLA | TPMSEKQLAE | VVERTVTPLM | KAQAIPGMAV | AVIYEGQPHY  | FTFGKADVAA | NKPVTPQTLF  | EL        | SISK      | TFT |
| MIR-1                     | ---MMTKS-- | ----LSCAL  | LLSVASSAFA | APMSEKQLAE | VVERTVTPLM | NAQAIPGMAV | AVIYQGQPHY  | FTFGKADVAA | NKPVTPQTLF  | EL        | SISK      | TFT |
| MOX-1                     | ---MQQRQS  | ILWG--AVAT | LMWAGLAHAG | EASPVDPRLP | VVDASIQPLL | KEHRIPGMAV | AVLKDGHKAHY | FNYGVANRES | GASVSEQTLF  | EI        | SVSK      | TLT |
| BIL-1                     | ---MMKKS-- | ----LCCAL  | LLTASFSTFA | AAKTEQQIAD | IVNRTITPLM | QEQAIPGMAV | AVIYQGKPHY  | FTWGKADIAN | NHPVTQOTLF  | EL        | SVSK      | TFN |
| LAT-1                     | ---MMKKS-- | ----LCSAL  | LLTASFSTFA | AAKTEQQIAD | IVNRTITPLM | QEQAIPGMAV | AVIYQGKPHY  | FTWGKADIAN | NHPVTQOTLF  | EL        | SVSK      | TFN |
| FOX-3                     | ---MQQRRR  | FALL--TLGS | LLLAPCTYA- | --SGEAPLTA | TVDGIHQPLM | KEYRIPGIAV | AVLKDGHKAHY | FNYGVANRES | GQRVSEQTLF  | EI        | SVSK      | TLT |
| CFE-1                     | ---MMKKS-- | ----ICCAL  | LLTASFSTFA | AAKTEQQIAD | IVNRTITPLM | QEQAIPGMAV | AVIYQGKPHY  | FTWGKADIAN | NRPVTQOTLF  | EL        | SVSK      | TFN |
| CMY-2                     | ---MMKKS-- | ----LCCAL  | LLTASFSTFA | AAKTEQQIAD | IVNRTITPLM | QEQAIPGMAV | AVIYQGKPHY  | FTWGKADIAN | NHPVTQOTLF  | EL        | SVSK      | TFN |

|                           | 101        | 110        | 120        | 130        | 140        | 150        | 160        | 170        | 180        | 190        | 200       |
|---------------------------|------------|------------|------------|------------|------------|------------|------------|------------|------------|------------|-----------|
|                           | .... ....  | .... ....  | .... ....  | .... ....  | .... ....  | .... ....  | .... ....  | .... ....  | .... ....  | .... ....  | .... .... |
| <i>E. cloacae</i> AmpC    | GVLGGDAIAR | GEISLDDAVT | RYWPQLTGKQ | WQGIRMLDLA | TYTAGGLPLQ | VPDEVTDN-A | SLLRFYQNWQ | PQWKPGTTRL | YANASIGLFG | ALAVKPSGMP |           |
| <i>P. aeruginosa</i> AmpC | ATLAGYALAQ | DKMRLDDRAS | QHWPALQGSR | FDGISLLDLA | TYTAGGLPLQ | FPDSVQKQQA | QIRDYRQWQ  | PTYAPGSQRL | YNSNSIGLFG | YLAARSLGQP |           |
| <i>E. coli</i> AmpC       | GVLGGDAIAR | GEIKLSDPPT | KYWPELTAKQ | WNGITLLHLA | TYTAGGLPLQ | VPDEVKSS-S | DLLRFYQNWQ | PAWAPGTQRL | YANSSIGLFG | ALAVKPSGLS |           |
| <i>C. freundii</i> AmpC   | GVLGGDRIAR | GEIKLSDPVT | KYWPELTGKQ | WRGISLLHLA | TYTAGGLPLQ | IPGDVTDK-A | ELLRFYQNWQ | PQWTPGAKRL | YANSSIGLFG | ALAVKSSGMS |           |
| <i>H. alvei</i> AmpC      | ATLASAQQVS | GKLSLDQSVS | HYVPELRGSS | FDHVSVLNVG | THTSG-LQLF | MPEDIKNT-T | QLMAYLKAWK | PADAAGTHR  | YNSIGTGLL  | MIAAKSLGVS |           |
| <i>M. organii</i> AmpC    | GVLGAVSVAK | KEMTLNDPAE | KYQPELALPQ | WKGITLLDLA | TYTAGGLPLQ | VPDAVKSR-A | DLLHFIYQWQ | PSRKPDMRL  | YANSSIGLFG | ALTANAAGMP |           |
| <i>P. stuartii</i> AmpC   | ATLATYAQIQ | GKLDIFSQVS | HYLPELKGSA | FDNVSMNLA  | THTSG-LSLF | VPSDIKTN-D | QLMAYYQKWL | PDNEVGQYRS | YSNLGVGLL  | IVTAKQLNDP |           |
| <i>S. marcescens</i> AmpC | ATLAVYAQQQ | GKLSFKDPAS | RYLPELRGSA | FDGVSLLNLA | THTSG-LPLF | VPDDVTDN-A | QLMAYYRAWQ | PKHPAGSYRV | YSNLGIQML  | MIAAKSLDQP |           |
| CMY-1                     | ATLGAYAVVK | GAMQLDDKAS | RHAPWLKGS  | FDSITMGELA | TYSAGGLPLQ | FPEEVDSS-E | KMRAYYRQWA | PVYSPGSHRQ | YNSNSIGLFG | HLAASSLKQP |           |
| DHA-1                     | GVLGAVSVAK | KEMALNDPAA | KYQPELALPQ | WKGITLLDLA | TYTAGGLPLQ | VPDAVKSR-A | DLLHFIYQWQ | PSRKPDMRL  | YANSSIGLFG | ALTANAAGMP |           |
| ACC-1                     | ATLASAQQVS | GKLSLDQSVS | HYVPELRGSS | FDHVSVLNVG | THTSG-LQLF | MPEDIKNT-T | QLMAYLKAWK | PADAAGTHR  | YNSIGTGLL  | MIAAKSLGVS |           |
| ACT-1                     | GVLGGDAIAR | GEISLDPVPT | KYWPELTGKQ | WQGIRMLDLA | TYTAGGLPLQ | VPDEVKDN-A | SLLRFYQNWQ | PQWKPGTTRL | YANASIGLFG | ALAVKPSGMS |           |
| MIR-1                     | GVLGGDAIAR | GEIALGDPVA | KYWPELTGKQ | WQGIRMLDLA | TYTAGGLPLQ | VPDEVTDN-A | SLLRFYQNWQ | PQWKPGTTRL | YANASIGLFG | ALAVKPSGMS |           |
| MOX-1                     | ATLGAYAVVK | GAMQLDDKAS | RHAPWLKGSV | FDSITMGELA | TYSAGGLPLQ | FPEEVDSS-E | KMRAYYRQWA | PVYSPGSHRQ | YNSNSIGLFG | HLAASSLKQP |           |
| BIL-1                     | GVLGRDAIAR | GEIKLSDPVT | KYWPELTGKQ | WQGIRLLHLA | TYTAGGLPLQ | IPDDVRDK-A | ALLHFIYQWQ | PQWTPGAKRL | YANSSIGLFG | ALAVKPSGMS |           |
| LAT-1                     | GVLGGDCIAR | GEIKLSDPVT | KYWPELTGKQ | WQGIRLLHLA | TYTAGGLPLQ | IPDDVRDK-A | ALLHFIYQWQ | PQWTPGAKRL | YANSSIGLFG | ALAVKPSGMS |           |
| FOX-3                     | ATLGAYAARK | GGFVLDKVS  | QHAPWLKGS  | LDGVTMAELA | TYSAGGLPLQ | FPDVKVDS-D | KMLTYRQWQ  | PVYPAGTHRQ | YNSNSIGLFG | HLAANSLGQP |           |
| CFE-1                     | GVLGGDAIAR | GEIKLSDPVT | KYWPELTGKQ | WQGIRLLHLA | TYTAGGLPLQ | VPDDVTDK-A | SLLRFYQNWQ | PQWAPGAKRL | YANSSIGLFG | ALAVKPSGMS |           |

CMY-2 GVLGGDAIAR GEIKLSDPVT KYWPELTGKQ WQGIRLLHLA TYTAGGLPLQ IPDDVRDK-A ALLHFYQNWQ PQWTPGAKRL YANSSIGLFG ALAVKPSGMS

201 210 220 230 240 250 260 270 280 290 300
E. cloacae AmpC YEQAMTTRVL KPLKLDHTWI NVPKAEAAHY AWGY-RDGKA VRVSPGMLDA QAYGVKTNVQ
P. aeruginosa AmpC FERLMEQVVF PALGLEQTHL DVPEAALAAQY AQQYGKDDRP LRVGPGPLDA EYGVKTSAA
E. coli AmpC FEQAMKTRVF QPLKLNHTWI NVPKAEAAHY AWGY-REGKA VHVSPGALDA EAYGVKSTIE
C. freundii AmpC YEEAMTRRVL QPLKLAHTWI TVPQSEQKNY AWGY-LEGKP VHVSPGALDA EAYGVKSSVI
H. alvei AmpC YEDAIEKTLL PQLGMHHSYL KVPADQMENY AWGYNKKDEP VHVNMEILGN EAYGIKTSS
M. morgani AmpC YEQLLTARIL APLGLSHTFI TVPESAQSQY AYGK-KNKKP VRVSPGQALDA ESYGVKSSASK
P. stuartii AmpC FSQAMEKLML PSLGLKHTYI HVPKSEQEKY AQQYKQKQNY VRLNLEILGP EAYGLKSNAR
S. marcescens AmpC FIQAMEQGML PALGMSHTYV QVPAQAMANY AQQYSKDDKP VRVNPGPLDA EAYGVKSNAR
CMY-1 FAPLMEQTLL PGLGMHHTYV NVPKQAMASY AYGSKEDKP IRVNPGLAD EAYGIKTSSA
DHA-1 YEQLLTARIL APLGLSHTFI TVPESAQSQY AYGK-KNKKP VRVSPGQALDA ESYGVKSSASK
ACC-1 YEDAIEKTLL PQLGMHHSYL KVPADQMENY AWGYNKKDEP VHVNMEILGN EAYGIKTSS
ACT-1 YEQAITTRVF KPLKLDHTWI NVPKAEAAHY AWGY-RDGKA VHVSPGALDA EAYGVKTNVQ
MIR-1 YEQAMTTRVF KPLKLDHTWI NVPKAEAAHF AWGY-REGKA VHVSPGMLDA EAYGVKTNVK
MOX-1 FAQLMEQTLL PGLGMHHTYV NVPKQAMASY AYGSKEDKP IRVNPGLAD EAYGIKTSSA
BIL-1 YEEAMTRRVL QPLKLAHTWI TVPQNEQKDY AWAY-REGKP VHVSPGQALDA EAYGVKSSVI
LAT-1 YEEAMTRRVL QPLKLAHTWI TVPQNEQKDY AWGY-REGKP VHVSPGALDA EAYGVKSSVI
FOX-3 FEQLMSQTLL PKLGLHHTYI QVPESAMANY AYGSKEDKP IRVTPGVLA EAYGIKTGSA
CFE-1 YEEAMTTRVL QPLKLAHTWI TVPQSEQKDY ALGY-REGKP VHVSPGQALDA EAYGVKSSV
CMY-2 YEEAMTRRVL QPLKLAHTWI TVPQNEQKDY AWGY-REGKP VHVSPGQALDA EAYGVKSSVI

Ambler positions 315-317 KTG Ambler positions 346
301 310 320 330 340 350 360 370 380 390 400
E. cloacae AmpC GLGWEMLNWP VEANTVVEGS DSKVALAPL VAEVNPPAPP VKAS-WVHKT GSTGGFGSYV AFVPEKQIGI VMLANTSYPN PARVEAAYHI LEALQ-----
P. aeruginosa AmpC GLGWAEYDWP ISLKRLQAGN STPMALQPHR IARLPAPQAL EGQR-LLNKT GSTNGFGAYV AFVPGRDGLG VILANRNPYN AERVKIAYAI LSGLEQQGKV
E. coli AmpC GLGWEMLDWP VNPDIINGS DNKIALAARP VKPITPPTPA VRAS-WVHKT GATGGFGSYV AFVPEKELGI VMLANKNYPN PARVEAAWQI LNALQ-----
C. freundii AmpC GLGWEMLNWP LKADSIINGS DSKVALAALP AVEVNPPAPA VKAS-WVHKT GSTGGFGSYV AFVPEKNLGI VMLANKSYPN PARVEAAWRI LEKLQ-----
H. alvei AmpC DLMWEQLPYP VSLPNLLTGN --DMAMTKSV ATPIVPPLPP QENV-WINKT GSTNGFGAYI AFVPAKMG I VMLANKNYSI DQRTVYAYKI LSSLEGNK--
M. morgani AmpC GLGWEMYDWP QQKDMIINGV TNEVALQPHP VTDN-QVQPY NRAS-WVHKT GATGFGAYV AFVPEKQVAI VILANKNYPN TERVKAQA I LSALE-----
P. stuartii AmpC DMMWESYPWP VLSQLLQGN RDDMALKPQK VELIKPAMAP EVRA-YYNKT GSSNGFATYA IFVPEEKI AI VMLSNKWIPI PQRITATYQL LEKIER----
S. marcescens AmpC DLMWENYPYP VKLSRLVEGN NAGMIMNGTP ATAITPPQ-P ELRAGWYNKT GSTGGFSTYA VFIPAKNIAV VMLANKWFPN DDRVEAAYHI IQALEKH---
CMY-1 GLGWESYAYP VTEQTLLAGN SAKVILEANP T---AAPRES GSQV-LFNKT GSTNGFGAYV AFVPARGIGI VMLANRNPYN EARIKAAHAI LAQLAG----
DHA-1 GLGWEMYDWP QQKDMIINGV TNEVALQPHP VTDN-QVQPY NRAS-WVHKT GATGFGAYV AFVPEKQVAI VILANKNYPN TERVKAQA I LSALE-----
ACC-1 DLMWEQLPYP VSLPNLLTGN --DMAMTKSV ATPIVPPLPP QENV-WINKT GSTNGFGAYI AFVPAKMG I VMLANKNYSI DQRTVYAYKI LSSLEGNK--
ACT-1 GLGWEMLNWP VDAKTVEGS DNKVALAPL AREVNPPAPP VNAS-WVHKT GSTGGFGSYV AFVPEKQLGI VMLANKSYPN PARVEAAYRI LSAL-----
MIR-1 GLGWEMLNWP VDAKTVEGS DNKVALAPL AVEVNPPAPP VKAS-WVHKT GSTGGFGSYV AFVPEKQLGI VMLANKSYPN PARVEAAYRI LDALQ-----
MOX-1 GLGWESYAYP VTEQTLLAGN SAKVILEANP T---AAPRES GSQV-LFNKT GSTNGFGAYV AFVPARGIGI VMLANRNPYN PARVKAHA I LAQLAG----
BIL-1 GLGWEMLNWP LKADSIINGS DTKVALAAVP AVEVNPPAPA VKAS-WVHKT GSTGGFGSYV AFVPEKNLGI VIVANKSYPN PVRVEAAWRI LEKLQ-----
LAT-1 GLGWEMLNWP LKADSIINGS DSKVALAALP AVEVNPPAPA VKAS-WVHKT GSTGGFGSYV AFVPEKNLGI VMLANKSYPN PVRVEAAWRI LEKLQ-----
FOX-3 GLGWESYDYP VTEQVLLAGN SPAVSFQANP VTRFAVPKAM GEQR-LYNKT GSTGGFGAYV AFVPARGIAI VMLANRNPYN EARVKAHA I LSQLAE----
CFE-1 GLGWEMLNWP VKADSIINGS DSKVALAALP AVEVNPPAPA VKAS-WVHKT GSTGGFGSYV AFVPEKNLGI VMLANKSYPN PARVEAAWRI LEKLQ-----
CMY-2 GLGWEMLNWP LKADSIINGS DSKVALAALP AVEVNPPAPA VKAS-WVHKT GSTGGFGSYV AFVPEKNLGI VMLANKSYPN PVRVEAAWRI LEKLQ-----

401404

P. aeruginosa AmpC

PLKR

**Supplementary Figure S1. Alignment of the amino acid sequence of representative chromosomal and plasmid-borne AmpC  $\beta$ -lactamases.**

Conserved motifs of are highlighted in red. Additional key residues in interaction with avibactam are shown in green-colored font. The asparagine residue studied here, Asn346 in Ambler numbering scheme, is highlighted in yellow. This residue is substituted by an isoleucine in *H. alvei* AmpC, *P. stuartii* AmpC, ACC-1, MOX-1, and FOX-3. Residues of the  $\Omega$  loop are indicated in orange. The deletion of RVGPGPL in the cAmpC for *P. aeruginosa* (PDC-5), which emerged ,under the selective pressure of ceftazidime combined to avibactam, is highlighted in blue. Residue E, replaced by K in another mutant is also highlighted in blue. Genbank accession numbers of AmpC  $\beta$ -lactamases are as follows: X07274 (*E. cloacae* P99), CP015117 (*P. aeruginosa* ATCC 27853), AY899338 (*E. coli* ATCC 25922), X03866 (*C. freundii* OS60), AF180953 (*H. alvei* HA-2), Y10283 (*M. morgani* SLM01), Y17315 (*P. stuartii* VDG96), AJ271368 (*S. marcescens* SLS73), X92508 (CMY-1), Y16410 (DHA-1), AJ133121 (ACC-1), U58495 (ACT-1), M37839 (MIR-1), D13304 (MOX-1), NG054644 (BIL-1), X78117 (LAT-1), NG049103 (FOX-3), AB107899 (CFE-1), NG048814 (CMY-2).

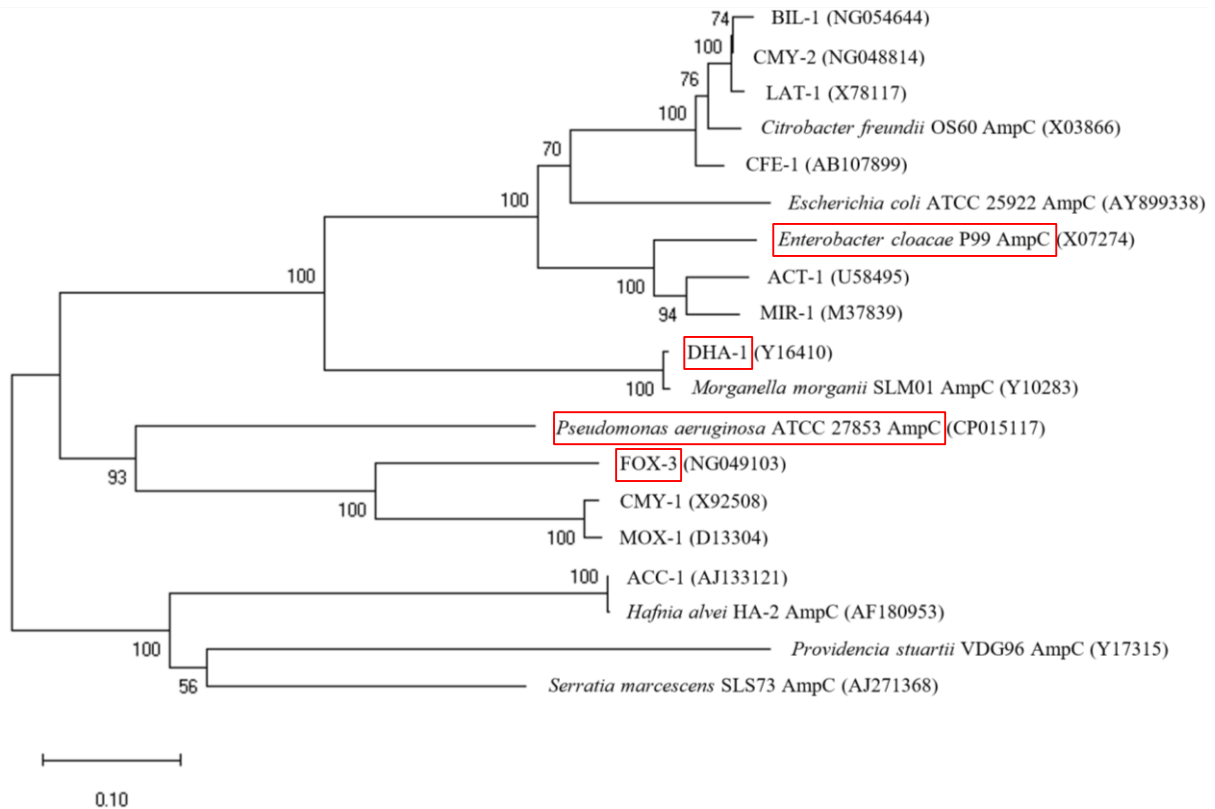

**Supplementary Figure S2. Unrooted evolutionary tree constructed with a set of 19 sequences representative of chromosomal and plasmid-borne AmpC  $\beta$ -lactamases.** Amino acid sequences are designated by their GenBank accession number. Evolutionary analyses were conducted in MEGA X using the neighbor-joining method (1). The percentage of replicate trees in which the associated taxa clustered together in the bootstrap test (500 replicates) are shown next to the branches. The evolutionary distances are in the units of the number of amino acid substitutions per site. Red boxes indicate AmpC cephalosporinases used in our study.

## SUPPLEMENTARY REFERENCES

- 1 Kumar S., Stecher G., Li M., Knyaz C., and Tamura K. (2018). MEGA X: Molecular Evolutionary Genetics Analysis across computing platforms. *Molecular Biology and Evolution* 35:1547-1549.
